# Supplementary material
Source: Springer Nature journal article supplement (https://www.springermedizin.de/resource/supplementary/12943_2012_1165_MOESM1_ESM.pdf/9552548)
Supplement: MOESM1 [file 9552548]

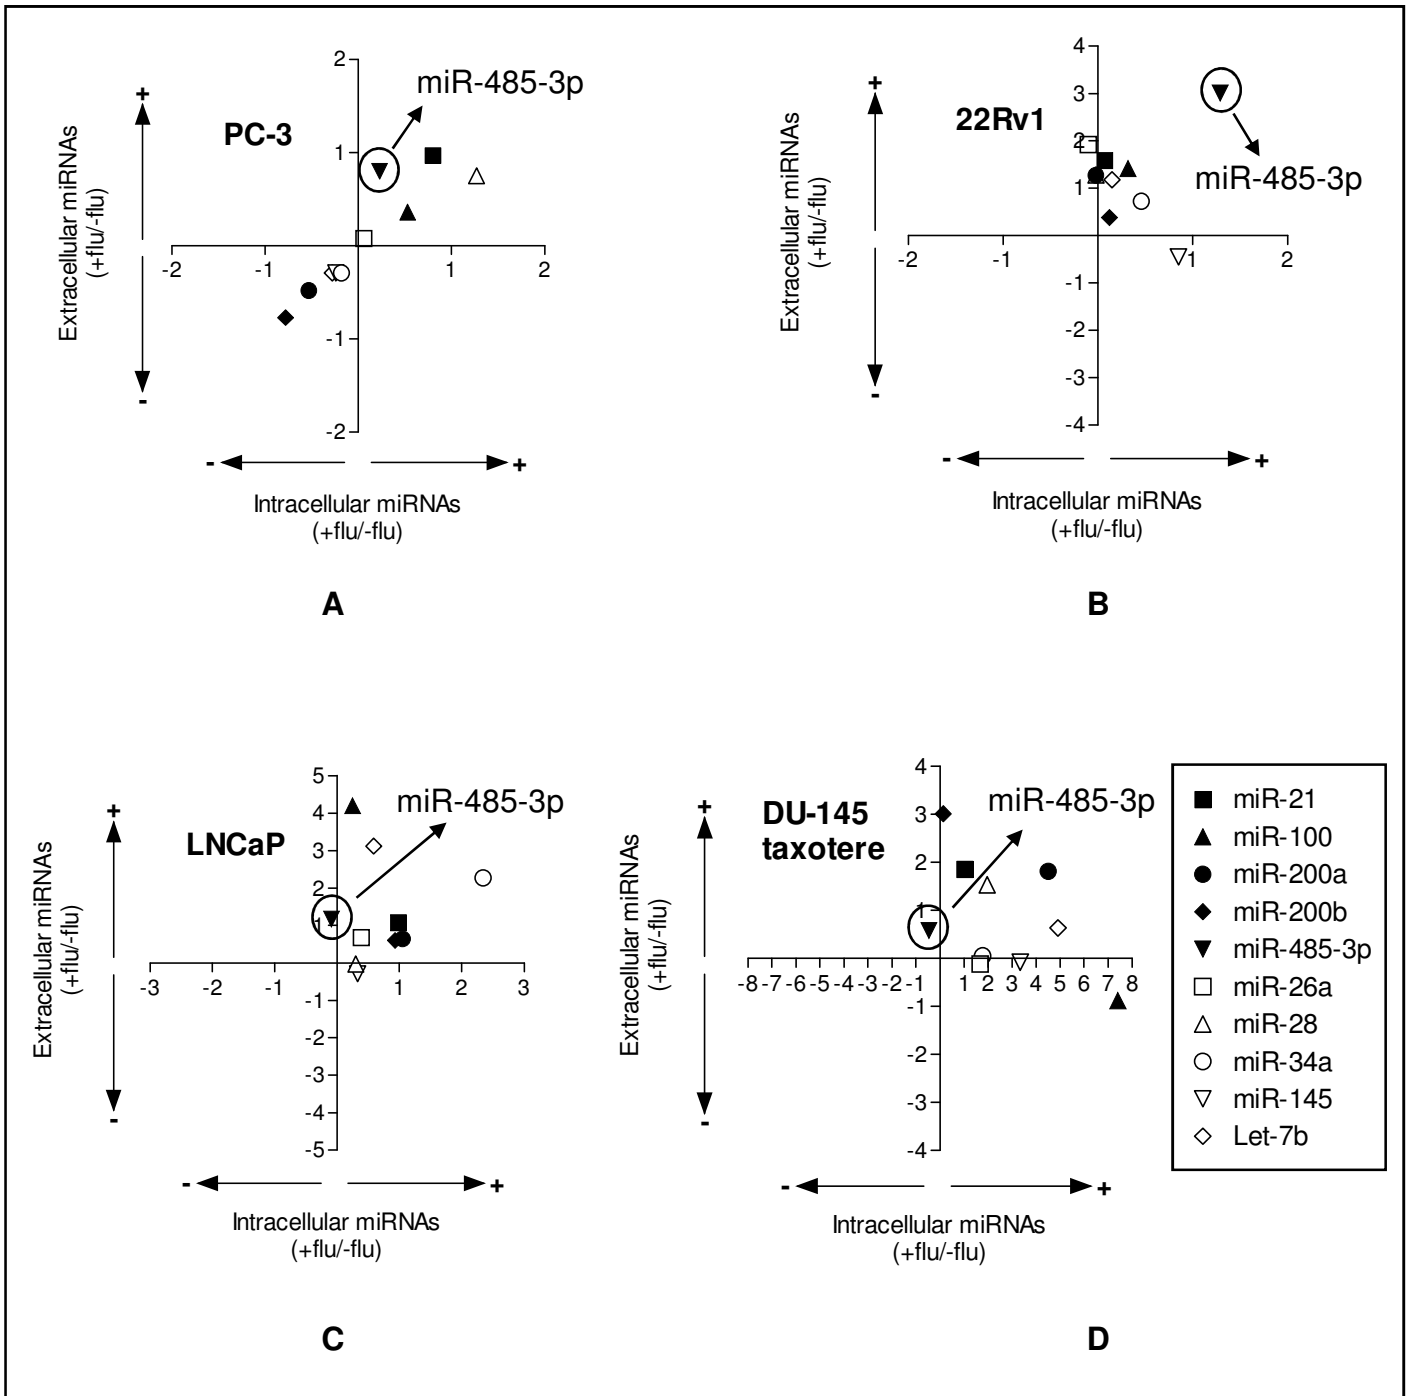

Figure S1
